# Supplementary material for: The dynamic behavior of dilute metallic alloy PdxAu1−x/SiO2raspberry colloid templated catalysts under CO oxidation
Source: Royal Society of Chemistry journal article supplement (doi:10.1039/d1cy00469g), 2021-01-01
Supplement: d1cy00469g1.pdf [file d1cy00469g1.pdf]

## Supplementary Information

### The dynamic behavior of dilute metallic alloy Pd<sub>x</sub>Au<sub>1-x</sub>/SiO<sub>2</sub> raspberry colloid templated catalysts under CO oxidation

**Authors:** Amanda Filie,<sup>a</sup> Tanya Shirman,<sup>a</sup> Michael Aizenberg,<sup>a</sup> Joanna Aizenberg,<sup>a,b</sup> Cynthia M. Friend,<sup>a,b</sup> and Robert J. Madix<sup>a\*</sup>

<sup>a</sup> John A. Paulson School of Engineering and Applied Sciences, Harvard University, Cambridge, MA 02138, USA.

<sup>b</sup> Department of Chemistry and Chemical Biology, Harvard University, Cambridge, MA 02138, USA.

\*corresponding author: rmadix@seas.harvard.edu

#### S.1 Quantification of CO<sub>2</sub> Production Using a GC-TCD

The calibration curve for quantifying the production of CO<sub>2</sub> was generated using a gas tank containing CO<sub>2</sub> diluted in He with a known analytic precision (Airgas, 5% ± 0.05% CO<sub>2</sub>, balance He; referred to hereafter as the CO<sub>2</sub>/He mixture). The CO<sub>2</sub>/He mixture was sent directly to the combined gas chromatograph-thermal conductivity detector (GC-TCD) via a mass flow controller at a total flow rate of 25.0 sccm. The response factor ( $m$ , Eq. 1) was determined by dividing the known concentration of CO<sub>2</sub> in the calibration mixture ( $x_{CO_2,cal}$ ) by the average area under the response curve of the TCD corresponding to the elution of CO<sub>2</sub> from the GC column ( $A_{TCD,cal}$ ). The uncertainty of the response factor ( $U(m)$ , Eq. 2) was calculated by error propagation; the error of the response factor was found to be two orders of magnitude lower than the factor itself.

$$m = \frac{x_{CO_2,cal}}{A_{TCD,cal}} \quad \text{Eq. 1}$$

$$U(m) = m \cdot \sqrt{\left(\frac{U(x_{CO_2,cal})}{x_{CO_2,cal}}\right)^2 + \left(\frac{U(A_{TCD,cal})}{A_{TCD,cal}}\right)^2} \quad \text{Eq. 2}$$

The rate of CO<sub>2</sub> formation ( $\dot{r}_{CO_2,volumetric}$ , Eq. 3) was calculated by multiplying the total volumetric flow rate of the reactor feed ( $\dot{Q}_{tot,in}$ ) and the concentration of CO<sub>2</sub> in the reactor effluent ( $x_{CO_2,out}$ ). The latter quantity was the product of the average area of the CO<sub>2</sub> elution peak of several chromatograms under steady state activity, and the response factor, essentially a re-arrangement of Eq. 1.

$$\dot{r}_{CO_2,volumetric} = \dot{Q}_{tot,in} \cdot x_{CO_2,out} = \dot{Q}_{tot,in} \cdot A_{TCD} \cdot m \quad \text{Eq. 3}$$

The rate of CO<sub>2</sub> produced normalized by the total mass of metal ( $\dot{r}_{CO_2, mass\ normalized}$ , Eq. 4), was calculated using the ideal gas law to convert standard cubic centimeters per minute to micromoles of CO<sub>2</sub> produced per second normalized by the mass of precious metal in the catalyst.

$$\dot{r}_{CO_2, mass\ normalized} = \dot{r}_{CO_2, volumetric} \times \frac{P}{R \cdot T} \times \frac{1}{w_{met} \cdot w_{Pd}} \quad \text{Eq. 4}$$

where  $P$  is atmospheric pressure (101325 Pa),

$R$  is the ideal gas constant (8.314 J/(mol · K)),

$T$  is the standard temperature (298 K),

$w_{met}$  is the total loading of precious metal on the silica support (weight %), and

$w_{Pd}$  is the average Pd composition of the bimetallic nanoparticles (weight %).

## S.2 Conditioning of Pd<sub>0.02</sub>Au<sub>0.98</sub> RCT-SiO<sub>2</sub>

The observed activation energy, when increasing from 523 K to 563 K in the initial temperature ramp, agrees with the previous light-off study (Fig. S1). The activation energy of sequential thermal treatments approaches  $\sim 80$  kJ per mole (Table S1) indicating the catalyst reached a conditioned state.

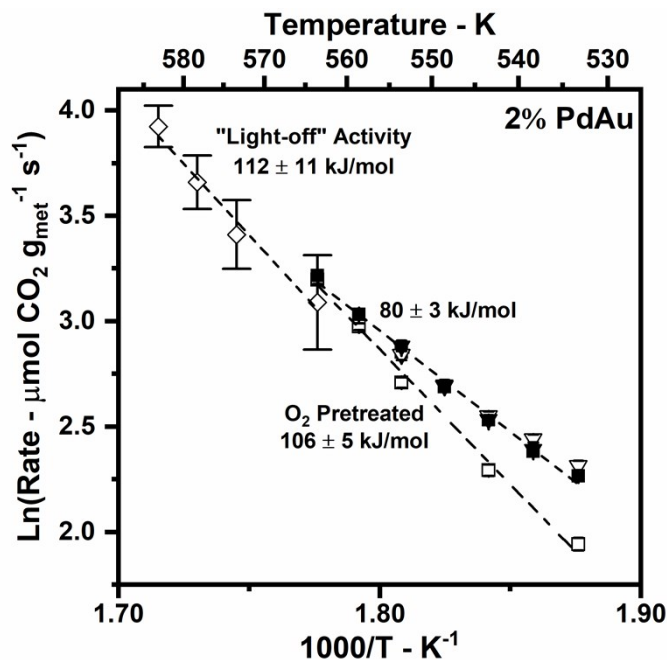

**Figure S1. Sequential temperature ramps between 538 K and 553 K revealed the initial activity of the O<sub>2</sub>-pretreated 2% PdAu catalyst agreed with the observed “light-off” activity and ultimately converged to a “conditioned state” where the activity at each temperature is reproduced.** The previously reported “light-off” activity ( $112 \pm 11 \text{ kJ mol}^{-1}$ ) of the “as-prepared” 2% PdAu catalyst ( $\diamond$ ) was similar to the initial apparent activation energy ( $106 \pm 6 \text{ kJ mol}^{-1}$ ) of the O<sub>2</sub>-pretreated 2% PdAu catalyst ( $\square$ ). Retracing the temperature downwards ( $\blacksquare$ ) showed activity was enhanced, resulting in a significantly lower activation energy ( $80 \pm 3 \text{ kJ mol}^{-1}$ ). Repeating this thermal treatment (increasing and decreasing temperature,  $\nabla$  and  $\blacktriangledown$ , respectively) showed this activity was reproducible and resulted in an activation energy of  $81 \pm 4 \text{ kJ per mole}$ . Data for the “as-prepared catalyst” taken from reference 1. Reaction conditions:  $523 \text{ K} \leq \text{temperature} \leq 563 \text{ K}$ ; 5% CO, 10% O<sub>2</sub>, balanced with He; total flow rate = 25.0 sccm; gas hourly space velocity = 2000 hr<sup>-1</sup>. Catalysts:  $m_{\text{cat}}$  “Light-off” Activity = 40.0 mg,  $m_{\text{cat}}$  O<sub>2</sub> Pretreated = 36.0 mg of Pd<sub>0.02</sub>Au<sub>0.98</sub> RCT-SiO<sub>2</sub>, metal loading = 11.6 wt%.

**Table S1.** The activation energy over sequential temperature ramps over the O<sub>2</sub>-pretreated 2% PdAu for the oxidation of CO, corresponding to the Arrhenius plot in Fig. S1. Reaction conditions: 523 K ≤ temperature ≤ 563 K; 5% CO, 10% O<sub>2</sub>, balanced with He; total flow rate = 25.0 sccm; gas hourly space velocity = 2000 hr<sup>-1</sup>. Catalyst: m<sub>cat</sub> O<sub>2</sub> Pretreated = 36.0 mg of Pd<sub>0.02</sub>Au<sub>0.98</sub> RCT-SiO<sub>2</sub>, metal loading = 11.6 wt%.

| Temperature Ramp | Activation Energy (kJ mol <sup>-1</sup> ) |
|------------------|-------------------------------------------|
| Increasing       | 106 ± 5                                   |
| Decreasing       | 80 ± 3                                    |
| Increasing       | 63 ± 3                                    |
| Decreasing       | 81 ± 4                                    |

The activation energies for sequential thermal treatments of the O<sub>2</sub>-pretreated 2% PdAu catalyst stabilized under reaction conditions at 553 K (Fig. S2) approaches an activation energy of ~85 kJ per mole (Table S2).

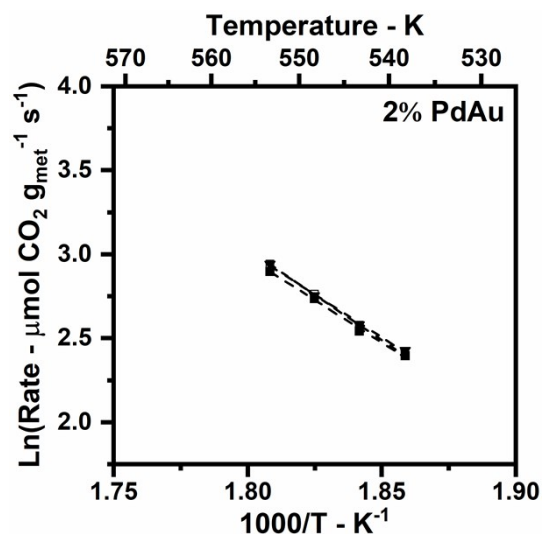

**Figure S2.** Sequential temperature ramps of the O<sub>2</sub>-pretreated 2% PdAu stabilized at 553 K under reaction conditions for ~ 3 h revealed the catalyst reached a “conditioned state,” where the activity at each temperature was reproduced regardless of direction of temperature change. The activation energy measured when the reaction temperature was decreased from 553 K to 538 K after stabilizing the catalyst (■) was found to be  $83 \pm 3$  kJ per mole. Retracing the temperatures upward (■) and then downward (■) resulted in the same activity within error suggesting the catalyst reached a “conditioned” state. Reaction conditions:  $538 \text{ K} \leq \text{temperature} \leq 553 \text{ K}$ ; 5% CO, 10% O<sub>2</sub>, balanced with He; total flow rate = 25.0 sccm; gas hourly space velocity = 2000 hr<sup>-1</sup>. Catalyst:  $m_{\text{cat}} = 36.0$  mg of Pd<sub>0.02</sub>Au<sub>0.98</sub> RCT-SiO<sub>2</sub>, metal loading = 11.6 wt%.

**Table S2.** The activation energy over sequential temperature ramps over the O<sub>2</sub>-pretreated 2% PdAu stabilized at 553 K under reaction conditions, corresponding to the Arrhenius plot in Fig. S2. Reaction conditions:  $538 \text{ K} \leq \text{temperature} \leq 553 \text{ K}$ ; 5% CO, 10% O<sub>2</sub>, balanced with He; total flow rate = 25.0 sccm; gas hourly space velocity = 2000 hr<sup>-1</sup>. Catalyst:  $m_{\text{cat}} = 36.0$  mg of Pd<sub>0.02</sub>Au<sub>0.98</sub> RCT-SiO<sub>2</sub>, metal loading = 11.6 wt%.

| Temperature Ramp | Activation Energy (kJ mol <sup>-1</sup> ) |
|------------------|-------------------------------------------|
| Decreasing       | $83 \pm 3$                                |
| Increasing       | $90 \pm 1$                                |
| Decreasing       | $85 \pm 4$                                |

### S.3 Conditioning of Au RCT-SiO<sub>2</sub> Compared to Pd<sub>0.02</sub>Au<sub>0.98</sub> RCT-SiO<sub>2</sub>

The steady state activity of the Au RCT-SiO<sub>2</sub> catalyst at 553 K after the thermal treatment (Fig. S3) was lower than that of the Pd<sub>0.02</sub>Au<sub>0.98</sub> RCT-SiO<sub>2</sub> (Fig. S2). Furthermore, the activation

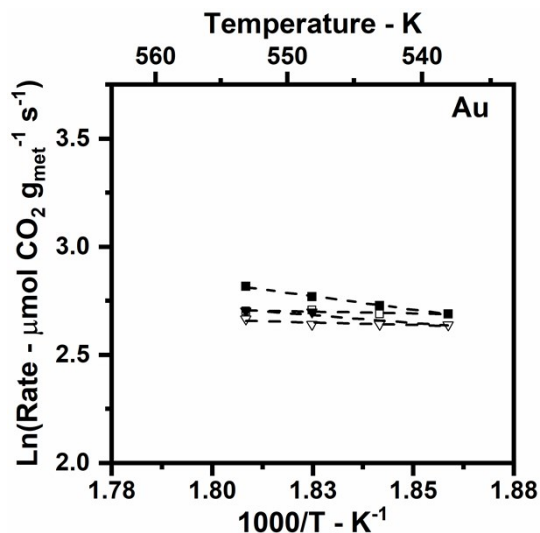

**Figure S3.** The activity of the O<sub>2</sub>-pretreated Au catalyst exposed to reaction conditions at 553 K for ~ 3 h declined gradually with thermal treatment. The activation energy measured when the reaction temperature was decreased from 553 K to 538 K after attempting to stabilize the catalyst (■) was found to be 21 ± 2 kJ per mole. Retracing the temperatures upward (▣), then downward (▢), and finally upward (▤) showed a decrease in catalyst activity, approaching a conditioned state insensitive to changes in temperatures. Reaction conditions: 538 K ≤ temperature ≤ 553 K; 5% CO, 10% O<sub>2</sub>, balanced with He; total flow rate = 25.0 sccm; gas hourly space velocity = 2000 hr<sup>-1</sup>. Catalyst: m<sub>cat</sub> = 40.8 mg of Au RCT-SiO<sub>2</sub>, metal loading = 9.2 wt%.

**Table S3.** The activation energy over sequential temperature ramps over the O<sub>2</sub> pretreated Au RCT-SiO<sub>2</sub> stabilized at 553 K under reaction conditions, corresponding to the Arrhenius plot in Fig. S3. Reaction conditions: 538 K ≤ temperature ≤ 553 K; 5% CO, 10% O<sub>2</sub>, balanced with He; total flow rate = 25.0 sccm; gas hourly space velocity = 2000 hr<sup>-1</sup>. Catalyst: m<sub>cat</sub> = 40.8 mg of Au RCT-SiO<sub>2</sub>, metal loading = 9.2 wt%.

| Temperature Ramp | Activation Energy (kJ mol <sup>-1</sup> ) |
|------------------|-------------------------------------------|
| Increasing       | 21 ± 2                                    |
| Decreasing       | 3 ± 2                                     |
| Increasing       | 12 ± 3                                    |
| Decreasing       | 4 ± 2                                     |

energy for CO oxidation over the Au RCT-SiO<sub>2</sub> approached zero (Table S3), which is different from the case of Pd<sub>0.02</sub>Au<sub>0.98</sub> RCT-SiO<sub>2</sub> that approached 85 kJ per mole (Table S2).

#### S.4 Au RCT-SiO<sub>2</sub> Insensitivity to Temperature: Steady State Activity at 553 K

The conditioned state of the monometallic Au catalyst was reached by initiating reaction conditions at 553 K and cycling the reaction temperature. Although the monometallic Au seemed to approach a steady state activity after 3 h at 553 K (Fig. S4A), catalyst activity gradually declined over time, during which 3 consecutive temperature ramps were conducted. The conditioned state of the Au catalyst exhibited a residual activity that was independent of reaction

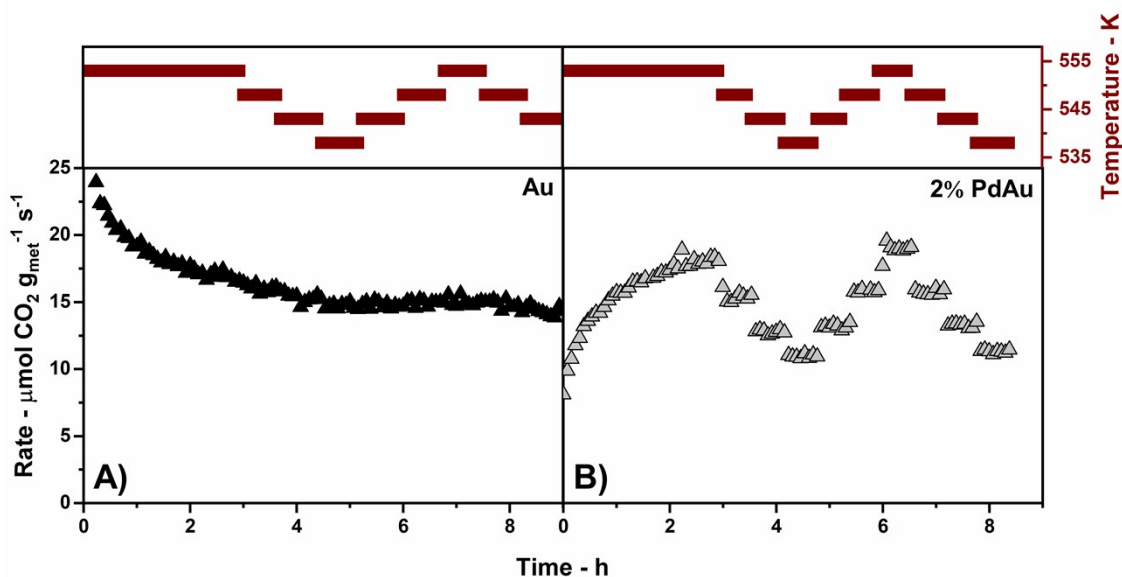

**Figure S4. The activity of the Au catalyst showed a gradual decline over reaction conditions while that of the 2% PdAu catalyst depended significantly on temperature.** (A) The rate of CO<sub>2</sub> formation over the O<sub>2</sub>-pretreated Au catalyst declined steadily at 553 K over 3 h, and further declined over time despite changes in temperature. (B) The rate of CO<sub>2</sub> formation over the O<sub>2</sub>-pretreated 2% PdAu catalyst steadily increased at 553 K over 3 h at 553 K and its activity responded to temperature ramps. Reaction conditions: 538 K  $\leq$  temperature  $\leq$  563 K; 5% CO, 10% O<sub>2</sub>, balanced with He; total flow rate = 25.0 sccm; gas hourly space velocity = 2000 hr<sup>-1</sup>. Catalysts:  $m_{\text{cat}} = 40.8$  mg of Au RCT-SiO<sub>2</sub>, metal loading = 9.2 wt%;  $m_{\text{cat}} = 36.0$  mg Pd<sub>0.02</sub>Au<sub>0.98</sub> RCT-SiO<sub>2</sub>, metal loading = 11.6 wt%.

temperature, unlike the activity of the 2% PdAu that depended on temperature (Fig. S4B).





## S.5 Au RCT-SiO<sub>2</sub> Insensitivity to Effects of Reaction Conditions at 553 K

The activity of the monometallic Au catalyst showed no sensitivity to temporary exposures to a CO/He or O<sub>2</sub>/He environment, unlike the 2% PdAu catalyst (Fig. S5).

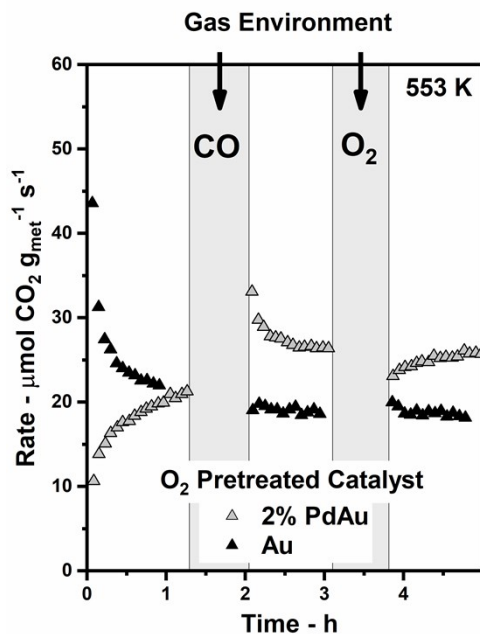

**Figure S5. The O<sub>2</sub>-pretreated Au and 2% PdAu catalysts showed very different behavior when subjected to a CO environment.** The CO/He environment had no effect on the activity of the Au, whereas a transient enhancing effect was observed for the 2% PdAu catalyst. Reaction conditions: temperature = 553 K; 5% CO, 10% O<sub>2</sub>, balanced with He; total flow rate = 25.0 sccm; gas hourly space velocity = 2000 hr<sup>-1</sup>. Catalysts:  $m_{\text{cat}} = 40.8$  mg of Au RCT-SiO<sub>2</sub>, metal loading 9.2 wt%;  $m_{\text{cat}} = 40$  mg of Pd<sub>0.02</sub>Au<sub>0.98</sub> RCT-SiO<sub>2</sub>, metal loading = 11.6 wt%.

## S.6 Au RCT-SiO<sub>2</sub> Kinetic Orders on CO and O<sub>2</sub>

The reaction orders over the monometallic Au catalyst showed a positive fractional order dependence on both CO (Fig. S6A) and O<sub>2</sub> (Fig. S6B).

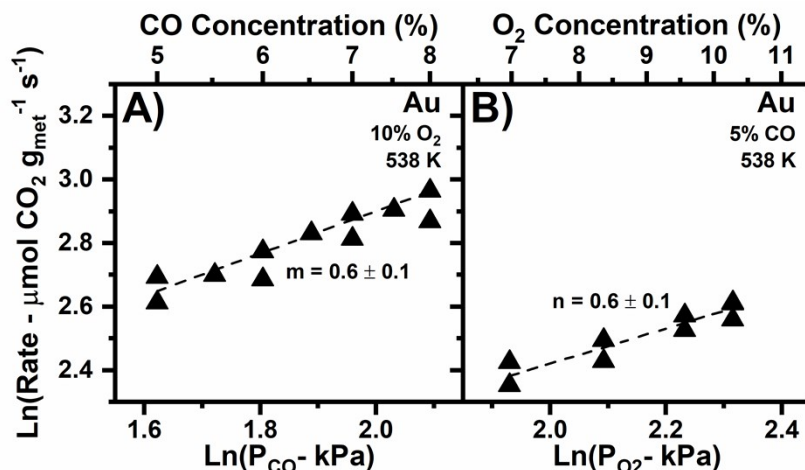

**Figure S6. The reaction order dependence of Au on CO and O<sub>2</sub> were both positive, fractional orders.** (A) The reaction order of CO and (B) O<sub>2</sub> were determined by changes in the rate of CO<sub>2</sub> production per mass of metal in Au as the inlet partial pressure of carbon monoxide and oxygen were varied, respectively, at 538 K. Reaction conditions: kinetic studies on CO, 5 - 8% CO, 10% O<sub>2</sub>, balanced with He; kinetic studies on O<sub>2</sub>, 5% CO, 7 - 10% O<sub>2</sub>, balanced with He. Total flow rate of 25.0 scfm; m<sub>cat</sub> = 40.8 mg of Au RCT-SiO<sub>2</sub>, metal loading 9.2 wt%.

## References

- 1 M. Luneau, T. Shirman, A. Filie, J. Timoshenko, W. Chen, A. Trimpalis, M. Flytzani-Stephanopoulos, E. Kaxiras, A. I. Frenkel, J. Aizenberg, C. M. Friend and R. J. Madix, *Chem. Mater.*, 2019, **31**, 5759–5768.
